# Supplementary material
Source: PubMed Central journal article supplement (PMC7442856)

**Fig.1**

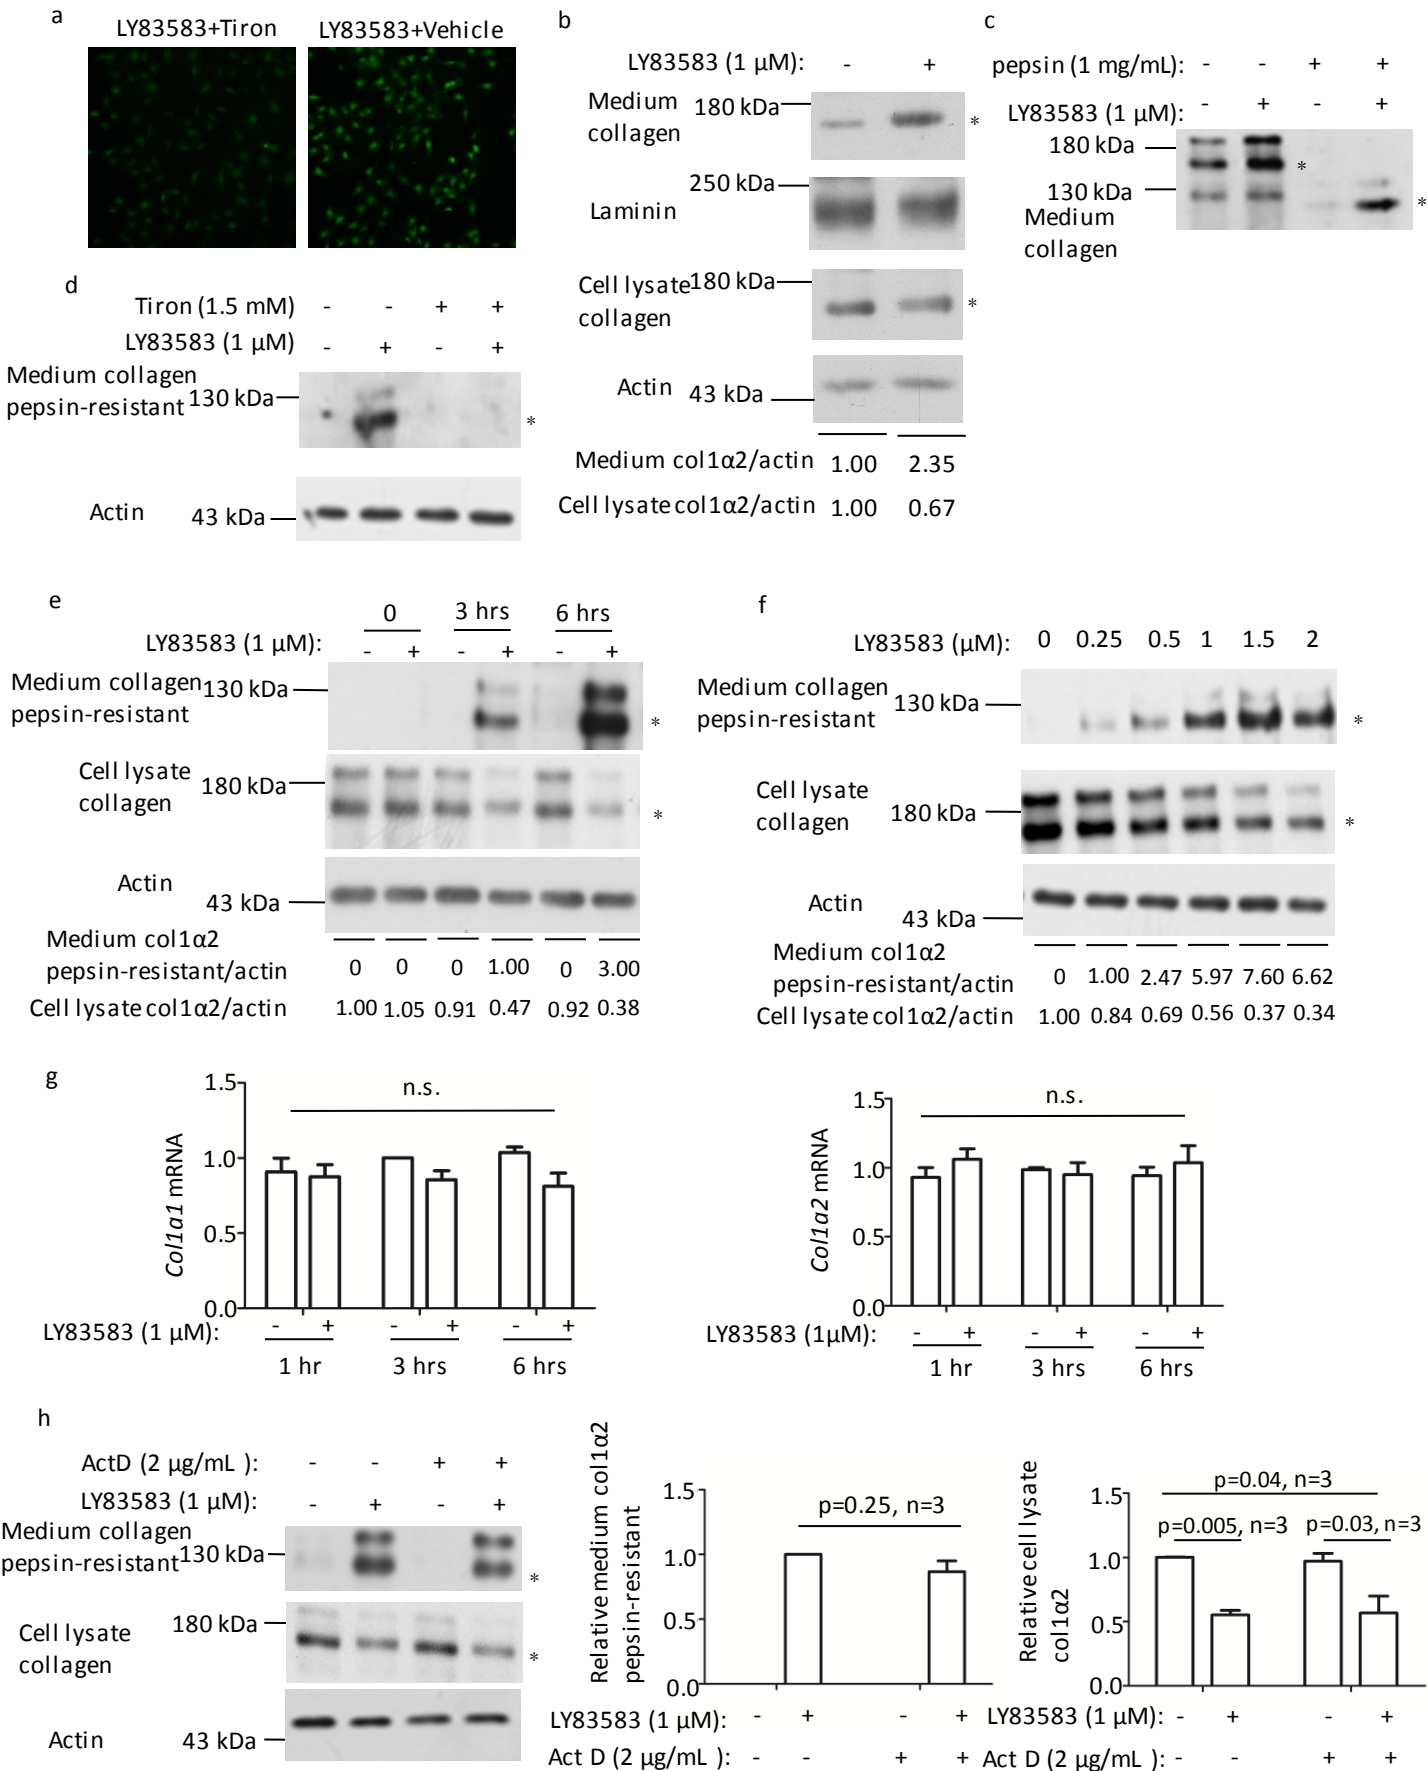

**Fig.2**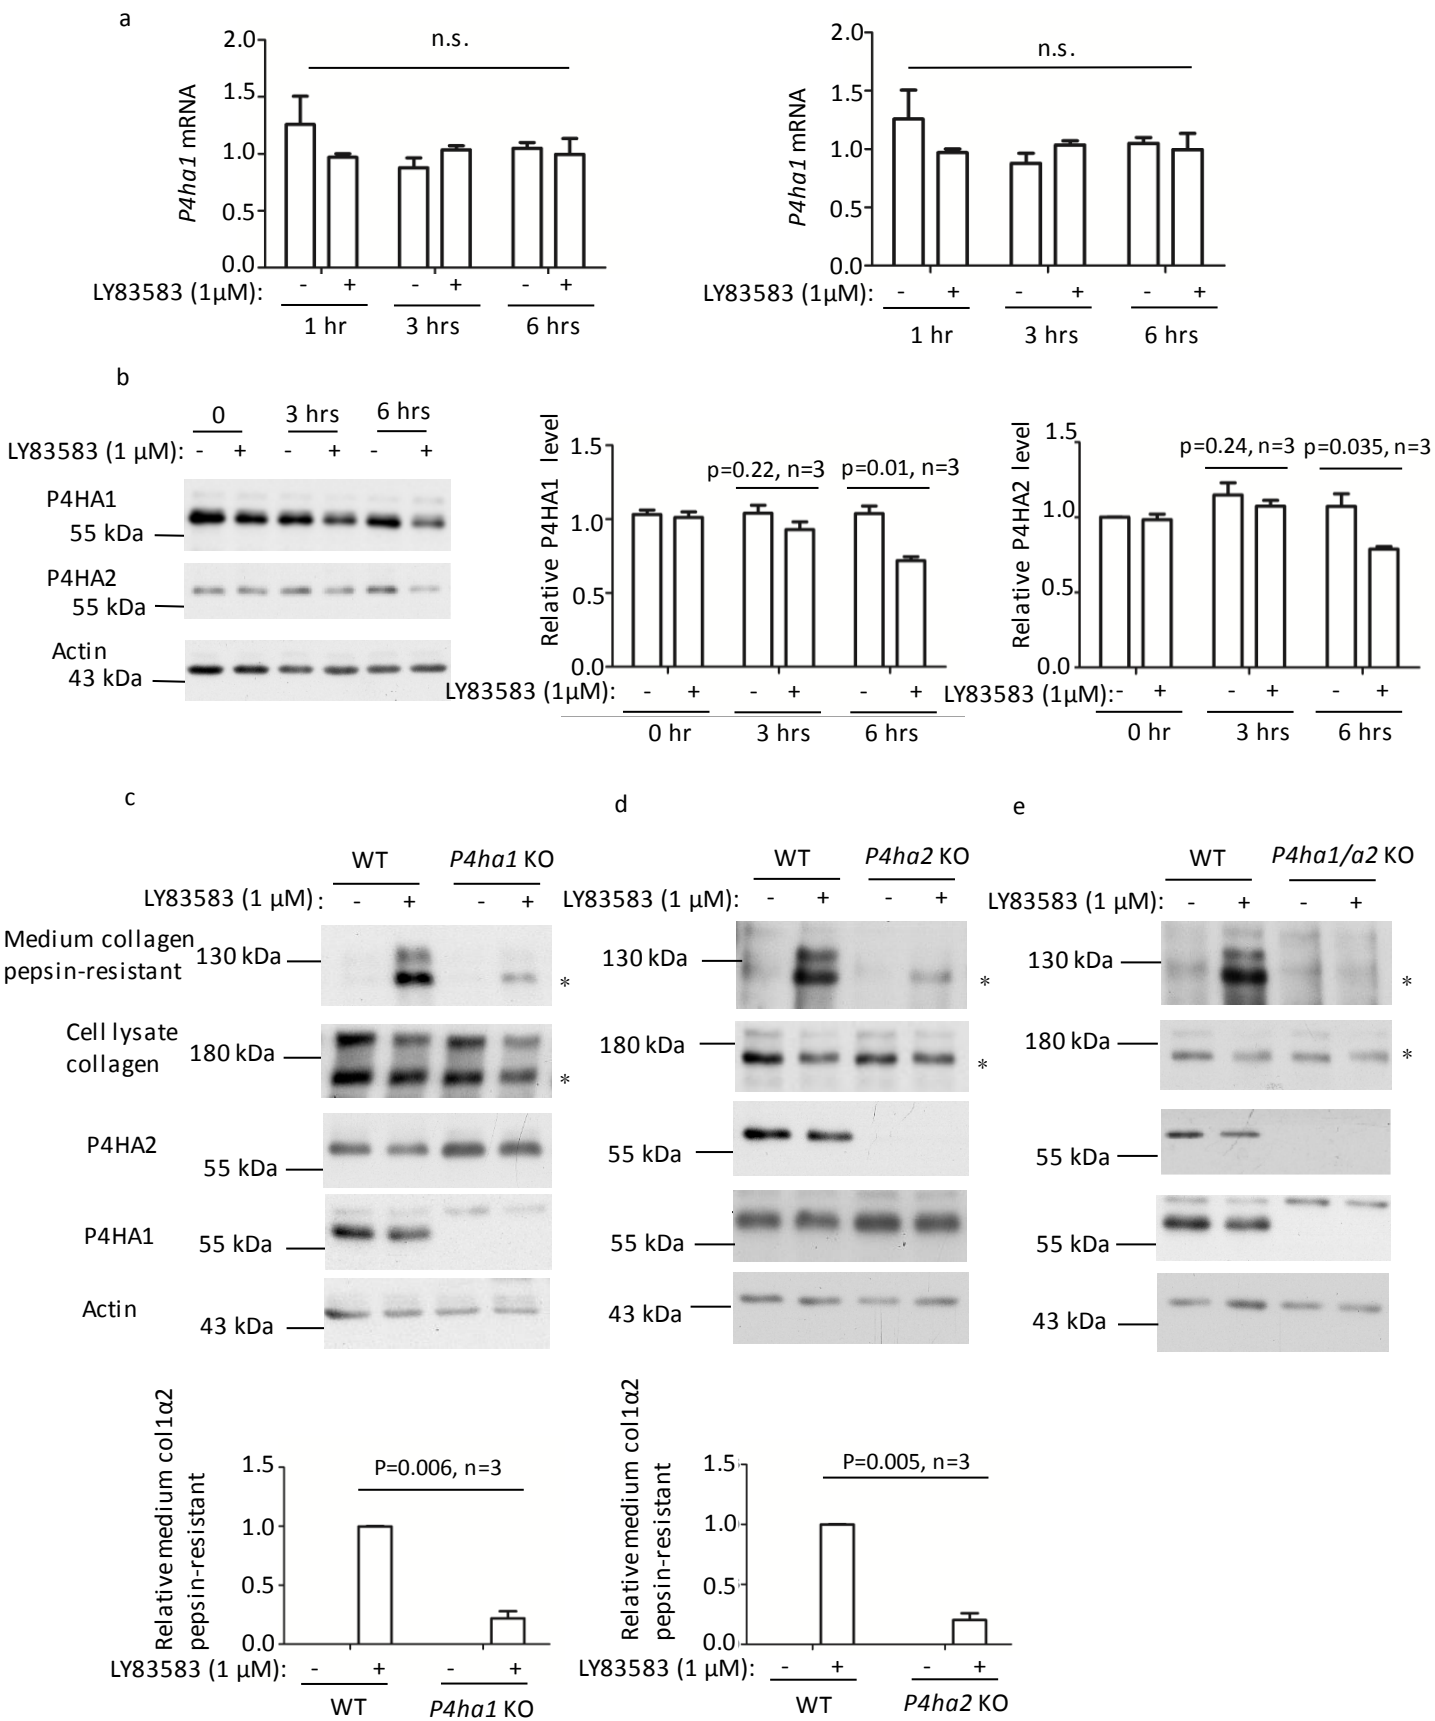

**Fig. 3**

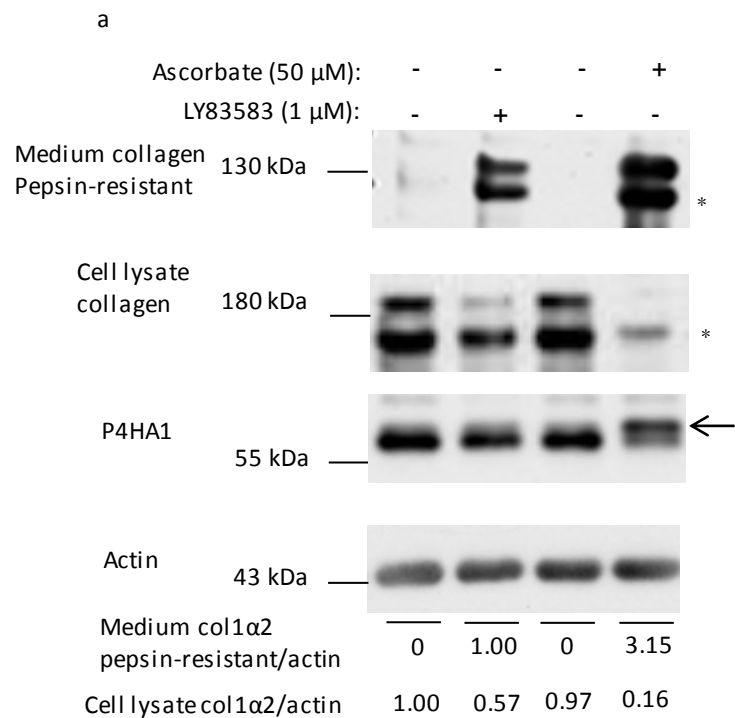

**b**

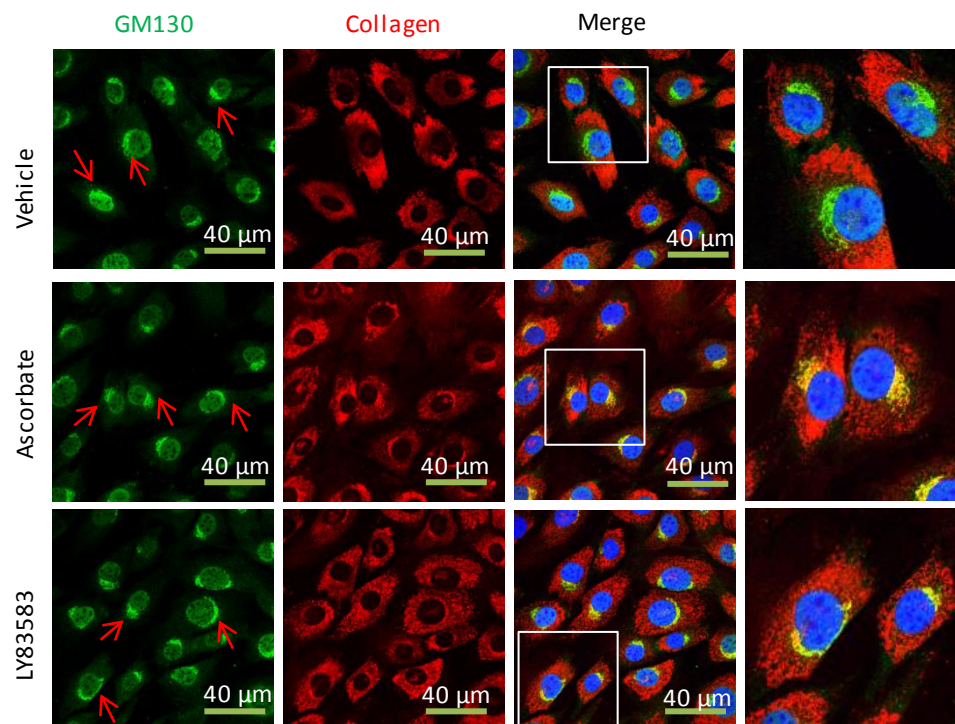

**c**

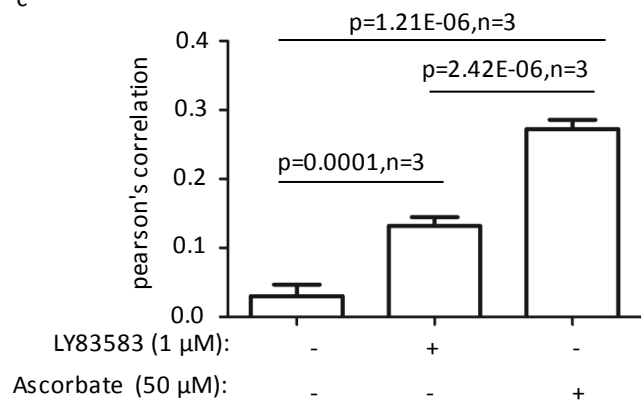

**Fig. 4**

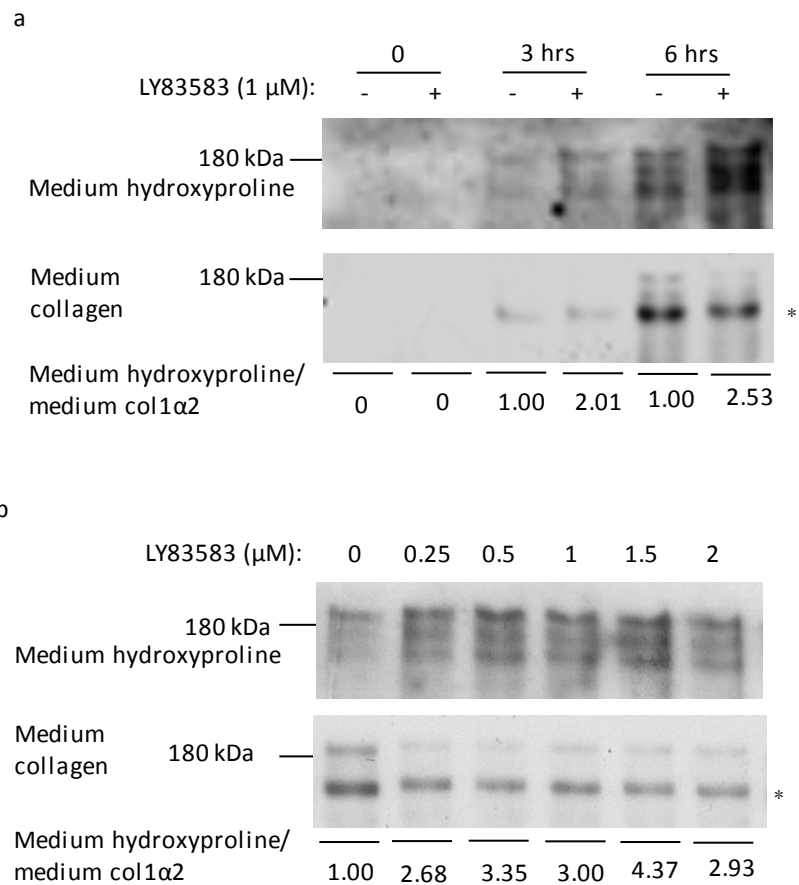

Supplement: NIHMS1617903-supplement-1.pdf [file NIHMS1617903-supplement-1.pdf]

Supplemental Fig.1

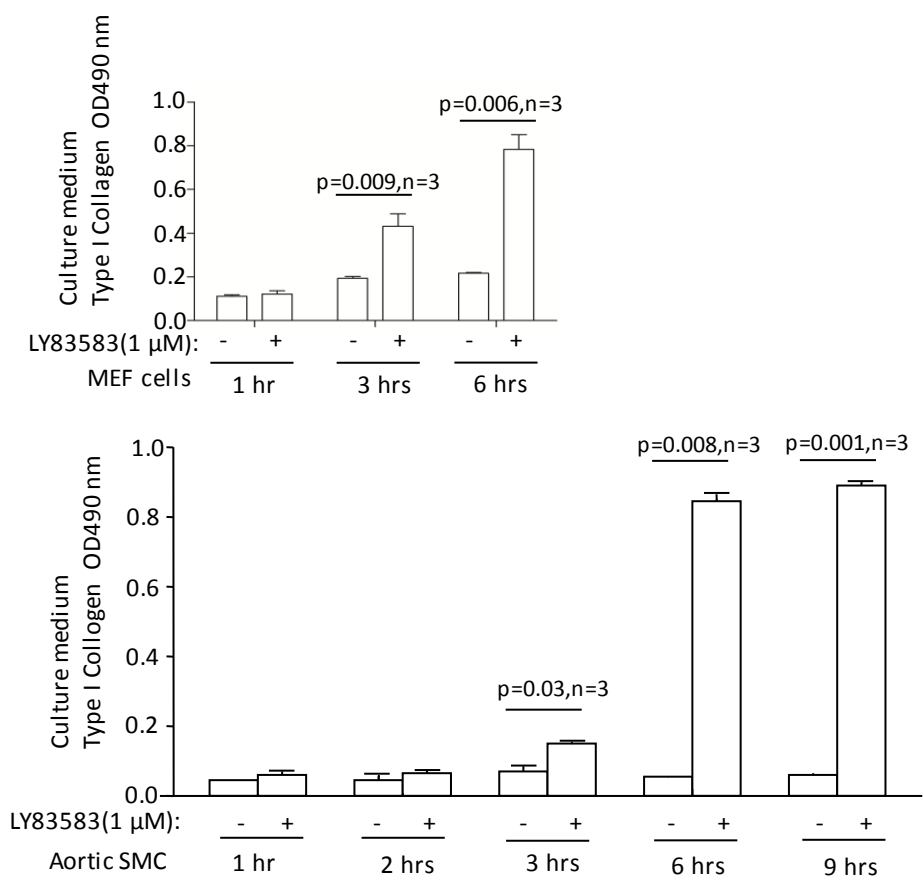

Supplemental Fig.2

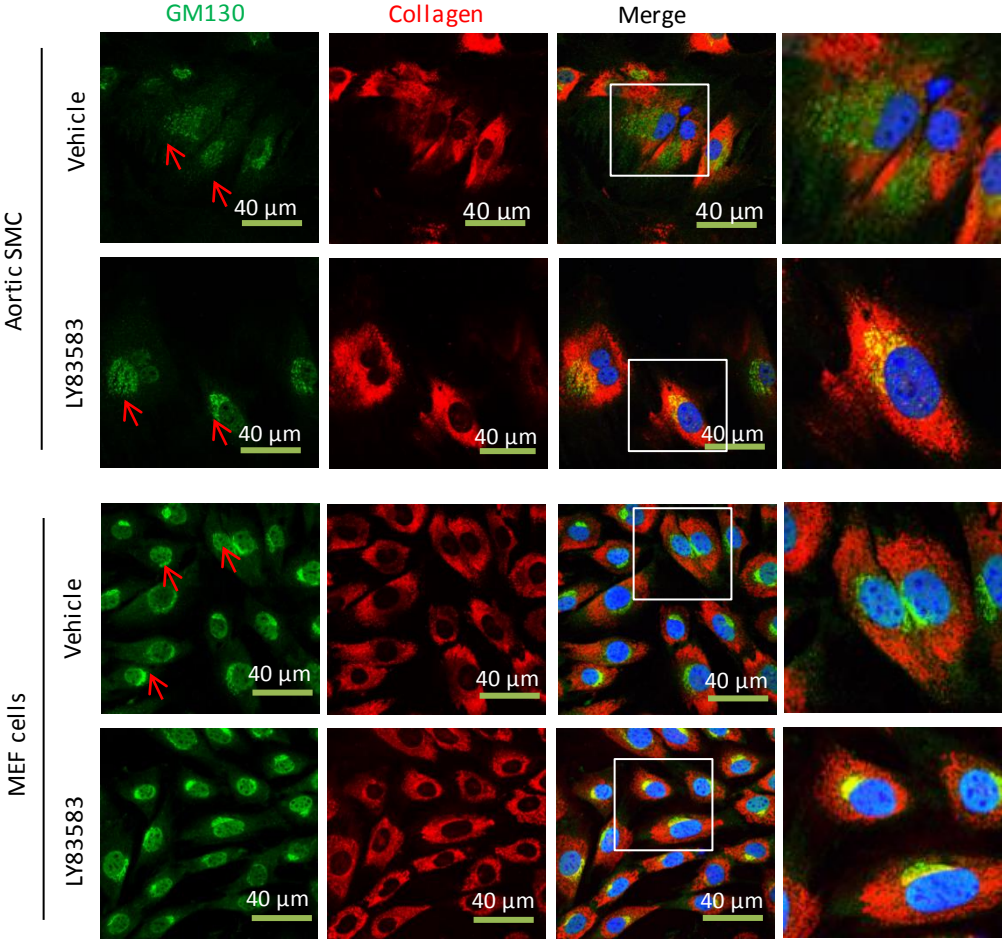

Supplement: NIHMS1617903-supplement-2.pdf [file NIHMS1617903-supplement-2.pdf]
